# Supplementary material
Source: PubMed Central journal article supplement (PMC6461092)
Supplement: IORT_A_1574395_SM2383.pdf [file IORT_A_1574395_SM2383.pdf]

## Supplementary data

Table 1. Primary THA volume with OA diagnosis

| Year                                 | Kaiser Permanente | Sweden      | Australia  |
|--------------------------------------|-------------------|-------------|------------|
| 2003                                 | 2,148             | 10,058      | 15,031     |
| 2004                                 | 2,901             | 10,678      | 16,124     |
| 2005                                 | 3,582             | 11,381      | 16,792     |
| 2006                                 | 3,907             | 11,525      | 17,408     |
| 2007                                 | 4,120             | 11,468      | 18,098     |
| 2008                                 | 4,535             | 11,538      | 19,785     |
| 2009                                 | 5,002             | 12,841      | 21,058     |
| 2010                                 | 5,827             | 13,128      | 22,565     |
| 2011                                 | 6,258             | 13,089      | 23,681     |
| 2012                                 | 6,974             | 13,267      | 24,525     |
| 2013                                 | 7,100             | 13,326      | 26,332     |
| 2014                                 | 8,322             | 13,646      | 28,571     |
| 2015                                 | 8,965             | 13,750      | 29,723     |
| 2015 population and THA incidence    |                   |             |            |
| Population                           | 10 million        | 9.9 million | 24 million |
| THA incidence (per 10 <sup>5</sup> ) | 0.09              | 0.14        | 0.12       |

Table 2. Primary THA patient characteristics. Values are frequency (percent) unless otherwise specified

|                               | Kaiser Permanente<br>n = 69,641 | Sweden<br>n = 159,695 | Australia<br>n = 279,693 |
|-------------------------------|---------------------------------|-----------------------|--------------------------|
| Follow-up, years <sup>a</sup> | 4.4 (3.3)                       | 5.5 (3.5)             | 5.1 (3.5)                |
| Sex                           |                                 |                       |                          |
| Male                          | 29,364 (42.2)                   | 68,218 (42.7)         | 128,953 (46.1)           |
| Female                        | 40,225 (57.8)                   | 91,477 (57.3)         | 150,740 (53.9)           |
| Age group                     |                                 |                       |                          |
| < 40                          | 610 (0.9)                       | 838 (0.5)             | 2,486 (0.9)              |
| 40–49                         | 3,396 (4.9)                     | 4,898 (3.1)           | 11,885 (4.2)             |
| 50–59                         | 14,379 (20.6)                   | 21,441 (13.4)         | 44,233 (15.8)            |
| 60–69                         | 24,165 (34.7)                   | 54,142 (33.9)         | 89,750 (32.1)            |
| 70–79                         | 19,437 (27.9)                   | 55,807 (34.9)         | 91,173 (32.6)            |
| 80–89                         | 7,292 (10.5)                    | 21,710 (13.6)         | 38,127 (13.6)            |
| 90+                           | 318 (0.5)                       | 859 (0.53)            | 2,039 (0.7)              |
| BMI category                  |                                 |                       |                          |
| < 30                          | 40,493 (58.9)                   | 68,251 (68.6)         | 14,973 (59.7)            |
| ≥ 30 and < 35                 | 17,346 (25.2)                   | 25,456 (25.6)         | 6,305 (25.1)             |
| ≥ 35                          | 10,873 (15.8)                   | 5,736 (5.8)           | 3,799 (15.1)             |
| ASA class                     |                                 |                       |                          |
| 1                             | 2,362 (3.5)                     | 24,724 (24.4)         | 8,043 (10.7)             |
| 2                             | 42,099 (61.9)                   | 60,548 (59.8)         | 42,289 (56.2)            |
| 3                             | 22,789 (33.5)                   | 15,534 (15.4)         | 23,847 (31.7)            |
| 4                             | 721 (1.1)                       | 367 (0.4)             | 1,088 (1.4)              |
| 5                             | 7 (0.0)                         | 3 (0.0)               | 9 (0.0)                  |
| <sup>a</sup> Mean (SD)        |                                 |                       |                          |

Table 3. Primary THA and main surgical approaches. Values are frequency (percent)

| Surgical approach | Kaiser Permanente<br>n = 69,641 | Sweden<br>n = 159,695 | Australia<br>n = 29,723 |
|-------------------|---------------------------------|-----------------------|-------------------------|
| Posterior         | 48,321 (74.8)                   | 86,692 (54.5)         | 13,029 (43.8)           |
| Lateral           | 7,925 (11.4)                    | 61,995 (38.8)         | 6,409 (21.6)            |
| Direct anterior   | 8,270 (12.8)                    |                       | 6,079 (20.5)            |

Table 4. Primary THA implants and characteristics. Values are frequency (percent)

|                   | Kaiser Permanente<br>n = 69,641 | Sweden<br>n = 159,695 | Australia<br>n = 279,693 |
|-------------------|---------------------------------|-----------------------|--------------------------|
| Femoral head size |                                 |                       |                          |
| ≤ 28              | 7,510 (10.7)                    | 87,994 (55.0)         | 67,730 (24.0)            |
| 32                | 23,560 (33.8)                   | 62,345 (39.0)         | 102,108 (36.5)           |
| 36                | 32,603 (46.8)                   | 7,328 (4.6)           | 89,608 (32.0)            |
| > 36              | 5,055 (7.3)                     | 535 (0.3)             | 20,156 (7.2)             |
| Missing           | 913 (1.3)                       | 54 (0.0)              | 91 (0.0)                 |
| Fixation          |                                 |                       |                          |
| Cemented          | 225 (0.3)                       | 116,753 (73.1)        | 16,490 (5.9)             |
| Cementless        | 61,004 (93.0)                   | 22,893 (14.3)         | 175,515 (62.8)           |
| Hybrid            | 4,288 (6.5)                     | 3,344 (2.1)           | 87,688 (31.4)            |
| Reverse hybrid    | 49 (0.0)                        | 16,705 (10.5)         |                          |
| Bearing surface   |                                 |                       |                          |
| Ceramic-on-       |                                 |                       |                          |
| ceramic           | 487 (0.7)                       | 633 (0.4)             | 67,410 (24.1)            |
| conventional      | 23 (0.0)                        | 11,747 (7.4)          | 3,661 (1.3)              |
| HXLPE             | 18,875 (27.1)                   | 8,058 (5.0)           | 54,760 (19.5)            |
| metal             | 141 (0.2)                       | 1 (0)                 | 300 (0.1)                |
| Metal-on-         |                                 |                       |                          |
| conventional      | 823 (1.2)                       | 78,880 (49.4)         | 20,987 (7.5)             |
| HXLPE             | 43,440 (62.4)                   | 58,066 (36.4)         | 11,419 (40.9)            |
| metal             | 4,608 (6.6)                     | 551 (0.3)             | 17,824 (6.4)             |

Table 5. Primary THA and hospital annual volumes. Values are frequency (percent)

| Annual primary THA volume | Kaiser Permanente<br>n = 69,641 | Sweden<br>n = 159,695 | Australia<br>n = 279,693 |
|---------------------------|---------------------------------|-----------------------|--------------------------|
| 1–50                      | 2,798 (4.0)                     | 2,825 (1.8)           | 35,161 (12.6)            |
| 51–100                    | 8,600 (12.4)                    | 17,423 (11.1)         | 68,007 (24.3)            |
| 101–150                   | 20,691 (29.7)                   | 32,878 (21.0)         | 50,598 (18.2)            |
| 151–200                   | 12,185 (17.5)                   | 33,453 (21.3)         | 35,371 (12.6)            |
| 201–250                   | 10,233 (14.7)                   | 21,185 (13.5)         | 18,056 (6.5)             |
| 251–300                   | 5,209 (7.9)                     | 20,365 (13.0)         | 22,427 (8.0)             |
| 301–400                   | 3,158 (4.5)                     | 13,710 (8.7)          | 7,678 (2.7)              |
| 401–500                   | 5,359 (7.7)                     | 8,861 (5.6)           | 21,729 (7.8)             |
| 501–600                   | 1,418 (2.0)                     | 0                     | 12,994 (4.6)             |
| > 600                     | 0 (0)                           | 8,995 (5.7)           | 7,672 (2.7)              |

Table 6. THA survival for all implants and all patients

|                                | Kaiser Permanente<br>n = 69,641 | Sweden<br>n = 159,695 | Australia<br>n = 279,693 |
|--------------------------------|---------------------------------|-----------------------|--------------------------|
| Revised primaries, n (%)       | 1,938 (2.8)                     | 4,411 (2.7)           | 10,832 (3.9)             |
| 5-year survival rate (95% CI)  | 97.0 (96.7–97.2)                | 97.8 (97.8–97.9)      | 96.3 (96.2–96.4)         |
| 10-year survival rate (95% CI) | 95.2 (94.7–95.6)                | 95.8 (95.6–95.9)      | 93.5 (93.4–93.7)         |

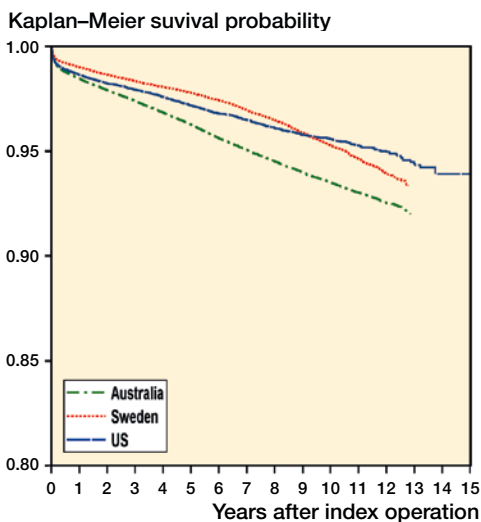

Figure 3. THA implant survival by country.

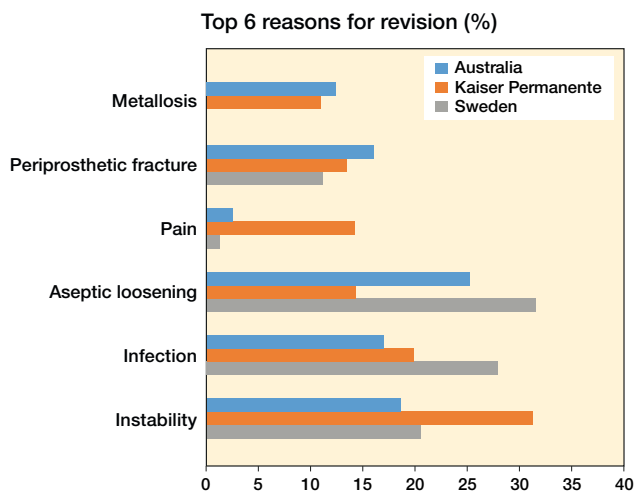

Figure 4. Top 6 reasons for revision.
